# Supplementary material
Source: publisher figshare collection journal article supplement (https://asha.figshare.com/articles/dataset/_/5890255)
Supplement: Supplementary file 1 [file 1]

**Supplemental Material S2.** Descriptives of proportion of mother communicative functions by race/ethnicity and poverty.

| Communicative function |                           | European American        |                              | African American         |                              | Latino American          |                              |
|------------------------|---------------------------|--------------------------|------------------------------|--------------------------|------------------------------|--------------------------|------------------------------|
|                        |                           | Poor<br>( <i>n</i> = 17) | Non-Poor<br>( <i>n</i> = 19) | Poor<br>( <i>n</i> = 20) | Non-Poor<br>( <i>n</i> = 13) | Poor<br>( <i>n</i> = 11) | Non-Poor<br>( <i>n</i> = 15) |
| Self-maintaining       | <i>M</i><br>( <i>SD</i> ) | .09<br>(.06)             | .09<br>(.05)                 | .12<br>(.04)             | .10<br>(.06)                 | .08<br>(.05)             | .10<br>(.04)                 |
| Directing              |                           | .61<br>(.06)             | .54<br>(.05)                 | .64<br>(.04)             | .60<br>(.06)                 | .58<br>(.06)             | .58<br>(.04)                 |
| Reporting              |                           | .33<br>(.04)             | .36<br>(.04)                 | .28<br>(.04)             | .31<br>(.03)                 | .34<br>(.04)             | .31<br>(.04)                 |
| Reasoning              |                           | .50<br>(.07)             | .51<br>(.10)                 | .54<br>(.05)             | .52<br>(.09)                 | .49<br>(.08)             | .53<br>(.04)                 |
| Predicting             |                           | .09<br>(.06)             | .11<br>(.04)                 | .09<br>(.05)             | .10<br>(.05)                 | .09<br>(.06)             | .10<br>(.04)                 |
| Projecting             |                           | .07<br>(.05)             | .05<br>(.04)                 | .05<br>(.03)             | .05<br>(.04)                 | .06<br>(.05)             | .06<br>(.04)                 |
| Imagining              |                           | .33<br>(.12)             | .33<br>(.13)                 | .32<br>(.10)             | .36<br>(.11)                 | .35<br>(.17)             | .37<br>(.07)                 |
| Responding             |                           | .31<br>(.06)             | .37<br>(.06)                 | .26<br>(.06)             | .30<br>(.05)                 | .33<br>(.06)             | .32<br>(.06)                 |

*Note.* *M* = mean; *SD* = standard deviation.
