# Supplementary material
Source: publisher figshare collection journal article supplement (https://asha.figshare.com/articles/dataset/_/5890255)
Supplement: Supplementary file 2 [file 1]

**Supplemental Material S1.** Descriptives of proportion of child communicative functions by race/ethnicity, poverty, and gender.

| Communicative<br>function |                           | European American |                 |                  |                 | African American |                 |                 |                 | Latino American |                 |                 |                 |
|---------------------------|---------------------------|-------------------|-----------------|------------------|-----------------|------------------|-----------------|-----------------|-----------------|-----------------|-----------------|-----------------|-----------------|
|                           |                           | Poor              |                 | Nonpoor          |                 | Poor             |                 | Nonpoor         |                 | Poor            |                 | Nonpoor         |                 |
|                           |                           | Girls             | Boys            | Girls            | Boys            | Girls            | Boys            | Girls           | Boys            | Girls           | Boys            | Girls           | Boys            |
|                           |                           | ( <i>n</i> = 9)   | ( <i>n</i> = 7) | ( <i>n</i> = 10) | ( <i>n</i> = 9) | ( <i>n</i> = 11) | ( <i>n</i> = 9) | ( <i>n</i> = 6) | ( <i>n</i> = 7) | ( <i>n</i> = 6) | ( <i>n</i> = 6) | ( <i>n</i> = 9) | ( <i>n</i> = 6) |
| Self-maintaining          | <i>M</i><br>( <i>SD</i> ) | .25<br>(.11)      | .22<br>(.10)    | .19<br>(.04)     | .17<br>(.12)    | .18<br>(.05)     | .13<br>(.11)    | .19<br>(.06)    | .14<br>(.09)    | .22<br>(.05)    | .15<br>(.06)    | .21<br>(.07)    | .18<br>(.04)    |
| Directing                 |                           | .40<br>(.09)      | .39<br>(.07)    | .41<br>(.05)     | .43<br>(.13)    | .42<br>(.10)     | .40<br>(.08)    | .40<br>(.08)    | .40<br>(.08)    | .37<br>(.03)    | .45<br>(.07)    | .41<br>(.10)    | .44<br>(.07)    |
| Reporting                 |                           | .44<br>(.14)      | .42<br>(.11)    | .47<br>(.07)     | .48<br>(.10)    | .45<br>(.07)     | .47<br>(.05)    | .43<br>(.05)    | .45<br>(.10)    | .52<br>(.10)    | .44<br>(.13)    | .45<br>(.09)    | .48<br>(.06)    |
| Reasoning                 |                           | .26<br>(.14)      | .22<br>(.16)    | .36<br>(.15)     | .28<br>(.11)    | .27<br>(.10)     | .22<br>(.11)    | .26<br>(.07)    | .23<br>(.10)    | .19<br>(.13)    | .27<br>(.08)    | .29<br>(.08)    | .33<br>(.05)    |
| Predicting                |                           | .03<br>(.05)      | .09<br>(.07)    | .07<br>(.06)     | .11<br>(.05)    | .12<br>(.10)     | .10<br>(.08)    | .11<br>(.10)    | .04<br>(.08)    | .02<br>(.04)    | .08<br>(.04)    | .05<br>(.05)    | .11<br>(.02)    |
| Projecting                |                           | .00<br>(.00)      | .04<br>(.06)    | .02<br>(.04)     | .00<br>(.00)    | .02<br>(.04)     | .01<br>(.02)    | .04<br>(.06)    | .01<br>(.03)    | .04<br>(.07)    | .03<br>(.04)    | .02<br>(.05)    | .01<br>(.03)    |
| Imagining                 |                           | .43<br>(.17)      | .51<br>(.09)    | .45<br>(.14)     | .41<br>(.19)    | .48<br>(.07)     | .45<br>(.21)    | .58<br>(.09)    | .52<br>(.09)    | .49<br>(.15)    | .47<br>(.26)    | .48<br>(.08)    | .44<br>(.09)    |
| Responding                |                           | .49<br>(.10)      | .49<br>(.11)    | .43<br>(.05)     | .46<br>(.09)    | .47<br>(.08)     | .50<br>(.13)    | .40<br>(.06)    | .49<br>(.10)    | .46<br>(.07)    | .43<br>(.11)    | .46<br>(.12)    | .45<br>(.11)    |

*Note.* *M* = mean; *SD* = standard deviation.
